# Supplementary material
Source: PubMed Central journal article supplement (PMC8754165)
Supplement: msphere.00809-21-st001.pdf [file msphere.00809-21-st001.pdf]

Table S1. Influenza A virus in swine detected in ISU VDL cases from the recent sustained human to swine spillover from 2017-2020 in the US.

| No. | Case                            | State | Date       | HA  | NA  | WGS | HA Genbank Accession | NA GenBank Accession |
|-----|---------------------------------|-------|------------|-----|-----|-----|----------------------|----------------------|
| 1   | A/swine/Oklahoma/A02216474/2017 | OK    | 3/1/2017   | Yes | No  | No  | MF280178             | None                 |
| 2   | A/swine/Indiana/A02216475/2017  | IN    | 4/4/2017   | Yes | Yes | No  | MF280176             | MF280177             |
| 3   | A/swine/Oklahoma/A02216476/2017 | OK    | 4/6/2017   | Yes | Yes | No  | MF280175             | MF280175             |
| 4   | A/swine/Oklahoma/25864/2017     | OK    | 4/10/2017  | Yes | No  | No  | MN931819             | None                 |
| 5   | A/swine/Oklahoma/24795/2017     | OK    | 4/13/2017  | Yes | No  | No  | MN931818             | None                 |
| 6   | A/swine/Oklahoma/A02218159/2017 | OK    | 6/13/2017  | Yes | Yes | No  | MF471676             | MF471677             |
| 7   | A/swine/Oklahoma/A02218157/2017 | OK    | 7/10/2017  | Yes | Yes | No  | MF471685             | MF471686             |
| 8   | A/swine/Oklahoma/A02218158/2017 | OK    | 7/10/2017  | Yes | Yes | Yes | MF471687             | MF471688             |
| 9   | A/swine/Oklahoma/65260/2017     | OK    | 9/29/2017  | Yes | No  | No  | MW361495             | None                 |
| 10  | A/swine/Indiana/66099/2017      | IN    | 10/3/2017  | Yes | No  | No  | MN931828             | None                 |
| 11  | A/swine/Oklahoma/65980/2017     | OK    | 10/3/2017  | Yes | No  | No  | MW361496             | None                 |
| 12  | A/swine/Ohio/70258/2017         | OH    | 10/20/2017 | Yes | No  | No  | MN931829             | None                 |
| 13  | A/swine/Ohio/71681/2017         | OH    | 10/26/2017 | Yes | No  | No  | MN931830             | None                 |
| 14  | A/swine/Oklahoma/21234/2018     | OK    | 3/23/2018  | Yes | No  | No  | MN931831             | None                 |
| 15  | A/swine/Iowa/27393/2018         | IA    | 4/16/2018  | Yes | No  | No  | MN931832             | None                 |
| 16  | A/swine/Indiana/A02254461/2018  | IN    | 7/27/2018  | Yes | Yes | Yes | MH802666             | MH802667             |
| 17  | A/swine/Indiana/A02256610/2018  | IN    | 8/22/2018  | Yes | Yes | Yes | MH910359             | MH910360             |
| 18  | A/swine/Indiana/71153/2018      | IN    | 10/11/2018 | Yes | No  | Yes | MN931836             | None                 |
| 19  | A/swine/Indiana/A02267494/2018  | IN    | 10/12/2018 | Yes | Yes | Yes | MK129518             | MK129519             |
| 20  | A/swine/Indiana/A02267447/2018  | IN    | 10/15/2018 | Yes | Yes | Yes | MK156662             | MK156663             |
| 21  | A/swine/Iowa/A02269644/2018     | IA    | 11/12/2018 | Yes | Yes | No  | MK358896             | MK358897             |
| 22  | A/swine/Illinois/89785/2018     | IL    | 12/20/2018 | Yes | No  | No  | MN931841             | None                 |
| 23  | A/swine/Illinois/90957/2018     | IL    | 12/27/2018 | Yes | No  | No  | MN931843             | None                 |
| 24  | A/swine/Indiana/A02427957/2018  | IN    | 12/27/2018 | Yes | Yes | Yes | MK418462             | MK418463             |
| 25  | A/swine/Iowa/A02429496/2019     | IA    | 1/14/2019  | Yes | Yes | No  | MK477689             | MK477690             |
| 26  | A/swine/Iowa/A02430102/2019     | IA    | 2/4/2019   | Yes | Yes | Yes | MK564265             | MK564266             |
| 27  | A/swine/Indiana/A02430356/2019  | IN    | 2/14/2019  | Yes | Yes | Yes | MK640458             | MK640459             |
| 28  | A/swine/Indiana/A02430541/2019  | IN    | 2/20/2019  | Yes | Yes | Yes | MK622823             | MK622824             |
| 29  | A/swine/Illinois/13663/2019     | IL    | 2/20/2019  | Yes | No  | No  | MN931848             | None                 |
| 30  | A/swine/Illinois/A02430694/2019 | IL    | 2/25/2019  | Yes | Yes | Yes | MK640446             | MK640447             |

|    |                                 |    |            |     |     |    |          |          |
|----|---------------------------------|----|------------|-----|-----|----|----------|----------|
| 31 | A/swine/Iowa/A02478495/2019     | IA | 5/20/2019  | Yes | Yes | No | MN066327 | MN066328 |
| 32 | A/swine/Oklahoma/A02478518/2019 | OK | 5/30/2019  | Yes | Yes | No | MN086856 | MN086857 |
| 33 | A/swine/Indiana/47676/2019      | IN | 6/21/2019  | Yes | No  | No | MN931853 | None     |
| 34 | A/swine/Ohio/A02478957/2019     | OH | 12/5/2019  | Yes | Yes | No | MN931961 | MN931962 |
| 35 | A/swine/Ohio/A02478941/2019     | IN | 12/6/2019  | Yes | Yes | No | MN931923 | MN931924 |
| 36 | A/swine/Indiana/A02479222/2020  | IN | 4/20/2020  | Yes | Yes | No | MT476724 | MT476725 |
| 37 | A/swine/Indiana/A02479308/2020  | IN | 5/11/2020  | Yes | Yes | No | MT554117 | MT554118 |
| 38 | A/swine/Indiana/A02479362/2020  | IN | 5/26/2020  | Yes | Yes | No | MT588206 | MT588208 |
| 39 | A/swine/Ohio/A02524449/2020     | OH | 6/29/2020  | Yes | Yes | No | MT772150 | MT772151 |
| 40 | A/swine/Iowa/A02524572/2020     | IA | 8/31/2020  | Yes | Yes | No | MW023637 | MW023638 |
| 41 | A/swine/Iowa/72078/2020         | IA | 9/15/2020  | Yes | No  | No | MW361506 | None     |
| 42 | A/swine/Illinois/A02524654/2020 | IL | 9/29/2020  | Yes | Yes | No | MW127128 | MW127129 |
| 43 | A/swine/Iowa/76794/2020         | IA | 10/1/2020  | Yes | No  | No | MW361508 | None     |
| 44 | A/swine/Indiana/A02524710/2020  | IN | 10/12/2020 | Yes | Yes | No | MW204487 | MW204488 |
| 45 | A/swine/Indiana/80683/2020      | IN | 10/15/2020 | Yes | No  | No | MW361510 | None     |

HA (Hemagglutinin gene); NA (Neuraminidase gene); WGS (Whole genome sequencing)
