# Supplementary material
Source: PubMed Central journal article supplement (PMC8754165)
Supplement: msphere.00809-21-st002.pdf [file msphere.00809-21-st002.pdf]

Table S2. Representative H3.2010.1 and H3.2010.2 influenza A virus from swine used in the antigenic distance analysis.

| <b>Strain name</b>                     | <b>Abbreviation</b> | <b>HA lineage</b> | <b>NA lineage</b> | <b>Internal gene lineage</b> | <b>Antigenic motif</b> |
|----------------------------------------|---------------------|-------------------|-------------------|------------------------------|------------------------|
| <i>A/swine/Missouri/A01410819/2014</i> | MO/14               | 3.2010.1          | N1-Sw             | PPPPPP                       | KTHNSK                 |
| <i>A/swine/Ohio/16TOSU4788/2016</i>    | OH/16               | 3.2010.1          | N2-02A-Sw         | TTTTPT                       | KTHNFK                 |
| <i>A/swine/Ohio/A01354299/2017</i>     | OH/17               | 3.2010.1          | N2-02B-Sw         | TTTTPT                       | NTHNFK                 |
| <i>A/swine/Oklahoma/A02218157/2017</i> | OK/17               | 3.2010.2          | N2-hu             | TTTTPT                       | STHNYK                 |
| <i>A/swine/Indiana/A02430356/2019</i>  | IN/19               | 3.2010.2          | N2-hu             | TTTTPT                       | STHNYN                 |
