# Supplementary material
Source: PubMed Central journal article supplement (PMC8754165)
Supplement: msphere.00809-21-st003.pdf [file msphere.00809-21-st003.pdf]

Table S3. Hemagglutinin (HA) amino acid sequence alignment of the H3.2010.1 and H3.2010.2 swine lineages used for antigenic analysis. Identity to the consensus sequences is represented by a dot (.). Antigenic motif is highlighted with red boxes.

|                                                |     |     |     |     |     |     |     |     |    |
|------------------------------------------------|-----|-----|-----|-----|-----|-----|-----|-----|----|
| Consensus                                      | 1   | 10  | 20  | 30  | 40  | 50  | 60  | 70  | 80 |
| 1. KJ941380   A/swine/Missouri/A01410819/2014  | Q   | K   | L   | P   | G   | N   | D   | N   | N  |
| 2. KX981496   A/swine/Ohio/16TOSU4788/2016     | Q   | K   | L   | P   | G   | N   | D   | N   | N  |
| 3. MF801569.1   A/swine/Ohio/A01354299/2017    | Q   | K   | L   | P   | G   | N   | D   | N   | N  |
| 4. MN931825   A/swine/Oklahoma/A02218157/2017  | Q   | K   | L   | P   | G   | N   | D   | N   | N  |
| 5. MN931846.1   A/swine/Indiana/A02430356/2019 | Q   | K   | L   | P   | G   | N   | D   | N   | N  |
| Consensus                                      | 90  | 100 | 110 | 120 | 130 | 140 | 150 | 160 |    |
| 1. KJ941380   A/swine/Missouri/A01410819/2014  | N   | K   | K   | W   | D   | L   | F   | V   | E  |
| 2. KX981496   A/swine/Ohio/16TOSU4788/2016     | N   | K   | K   | W   | D   | L   | F   | V   | E  |
| 3. MF801569.1   A/swine/Ohio/A01354299/2017    | N   | K   | K   | W   | D   | L   | F   | V   | E  |
| 4. MN931825   A/swine/Oklahoma/A02218157/2017  | N   | K   | K   | W   | D   | L   | F   | V   | E  |
| 5. MN931846.1   A/swine/Indiana/A02430356/2019 | N   | K   | K   | W   | D   | L   | F   | V   | E  |
| Consensus                                      | 170 | 180 | 190 | 200 | 210 | 220 | 230 | 240 |    |
| 1. KJ941380   A/swine/Missouri/A01410819/2014  | Y   | P   | A   | L   | E   | V   | T   | M   | P  |
| 2. KX981496   A/swine/Ohio/16TOSU4788/2016     | Y   | P   | A   | L   | E   | V   | T   | M   | P  |
| 3. MF801569.1   A/swine/Ohio/A01354299/2017    | Y   | P   | A   | L   | E   | V   | T   | M   | P  |
| 4. MN931825   A/swine/Oklahoma/A02218157/2017  | Y   | P   | A   | L   | E   | V   | T   | M   | P  |
| 5. MN931846.1   A/swine/Indiana/A02430356/2019 | Y   | P   | A   | L   | E   | V   | T   | M   | P  |
| Consensus                                      | 250 | 260 | 270 | 280 | 290 | 300 | 310 | 320 |    |
| 1. KJ941380   A/swine/Missouri/A01410819/2014  | D   | I   | L   | L   | I   | N   | S   | T   | G  |
| 2. KX981496   A/swine/Ohio/16TOSU4788/2016     | D   | I   | L   | L   | I   | N   | S   | T   | G  |
| 3. MF801569.1   A/swine/Ohio/A01354299/2017    | D   | I   | L   | L   | I   | N   | S   | T   | G  |
| 4. MN931825   A/swine/Oklahoma/A02218157/2017  | D   | I   | L   | L   | I   | N   | S   | T   | G  |
| 5. MN931846.1   A/swine/Indiana/A02430356/2019 | D   | I   | L   | L   | I   | N   | S   | T   | G  |
| Consensus                                      | 330 | 340 | 350 | 360 | 370 | 380 | 390 | 400 |    |
| 1. KJ941380   A/swine/Missouri/A01410819/2014  | R   | N   | I   | P   | E   | K   | Q   | T   | R  |
| 2. KX981496   A/swine/Ohio/16TOSU4788/2016     | R   | N   | I   | P   | E   | K   | Q   | T   | R  |
| 3. MF801569.1   A/swine/Ohio/A01354299/2017    | R   | N   | I   | P   | E   | K   | Q   | T   | R  |
| 4. MN931825   A/swine/Oklahoma/A02218157/2017  | R   | N   | I   | P   | E   | K   | Q   | T   | R  |
| 5. MN931846.1   A/swine/Indiana/A02430356/2019 | R   | N   | I   | P   | E   | K   | Q   | T   | R  |
| Consensus                                      | 410 | 420 | 430 | 440 | 450 | 460 | 470 | 480 |    |
| 1. KJ941380   A/swine/Missouri/A01410819/2014  | E   | V   | E   | G   | R   | I   | Q   | D   | L  |
| 2. KX981496   A/swine/Ohio/16TOSU4788/2016     | E   | V   | E   | G   | R   | I   | Q   | D   | L  |
| 3. MF801569.1   A/swine/Ohio/A01354299/2017    | E   | V   | E   | G   | R   | I   | Q   | D   | L  |
| 4. MN931825   A/swine/Oklahoma/A02218157/2017  | E   | V   | E   | G   | R   | I   | Q   | D   | L  |
| 5. MN931846.1   A/swine/Indiana/A02430356/2019 | E   | V   | E   | G   | R   | I   | Q   | D   | L  |
| Consensus                                      | 490 | 500 | 510 | 520 | 530 | 540 | 550 |     |    |
| 1. KJ941380   A/swine/Missouri/A01410819/2014  | I   | R   | N   | G   | T   | Y   | D   | H   | V  |
| 2. KX981496   A/swine/Ohio/16TOSU4788/2016     | I   | R   | N   | G   | T   | Y   | D   | H   | V  |
| 3. MF801569.1   A/swine/Ohio/A01354299/2017    | I   | R   | N   | G   | T   | Y   | D   | H   | V  |
| 4. MN931825   A/swine/Oklahoma/A02218157/2017  | I   | R   | N   | G   | T   | Y   | D   | H   | V  |
| 5. MN931846.1   A/swine/Indiana/A02430356/2019 | I   | R   | N   | G   | T   | Y   | D   | H   | V  |
