# Supplementary material
Source: PubMed Central journal article supplement (PMC8754165)
Supplement: msphere.00809-21-st004.pdf [file msphere.00809-21-st004.pdf]

Table S4. HA1 percentage amino acid identity of H3.2010.1 and H3.2010.2 strains used in the antigenic distance analysis.

| Genbank accession | Strain                          | A/swine/Missouri/A01410819/2014 | A/swine/Ohio/16TOSU4788/2016 | A/swine/Ohio/A01354299/2017 | A/swine/Oklahoma/A02218157/2017 | A/swine/Indiana/A02430356/2019 |
|-------------------|---------------------------------|---------------------------------|------------------------------|-----------------------------|---------------------------------|--------------------------------|
| KJ941380          | A/swine/Missouri/A01410819/2014 |                                 | 97.7                         | 96.5                        | 90.4                            | 88.7                           |
| KX981496          | A/swine/Ohio/16TOSU4788/2016    | 97.7                            |                              | 98.8                        | 91.0                            | 88.7                           |
| MF801569.1        | A/swine/Ohio/A01354299/2017     | 96.5                            | 98.8                         |                             | 90.1                            | 88.4                           |
| MF471685          | A/swine/Oklahoma/A02218157/2017 | 90.4                            | 91.0                         | 90.1                        |                                 | 97.1                           |
| MK640458.1        | A/swine/Indiana/A02430356/2019  | 88.7                            | 88.7                         | 88.4                        | 97.1                            |                                |
